# Supplementary material for: The use and impact of quality of life assessment tools in clinical care settings for cancer patients, with a particular emphasis on brain cancer: insights from a systematic review and stakeholder consultations
Source: Springer Nature journal article supplement (doi:10.1007/s11136-016-1278-6), 2016-04-02
Supplement: MOESM1 [file 10682922]

## **Supplementary File 1: Table of QOL Tools**

**Title: The use and impact of quality of life assessment tools in clinical care settings for cancer patients, with a particular emphasis on brain cancer: insights from a systematic review and stakeholder consultations**

### **AUTHORS**

Dr Sarah King<sup>1</sup>  
Josephine Exley<sup>2</sup>  
Dr Sarah Parks<sup>2</sup>  
Dr Sarah Ball<sup>2</sup>  
Teresa Bienkowska-Gibbs<sup>2</sup>  
Calum MacLure<sup>2</sup>  
Emma Harte<sup>2</sup>  
Katherine Stewart<sup>2</sup>  
Jody Larkin<sup>3</sup>  
Dr Andrew Bottomley<sup>4</sup>  
Dr Sonja Marjanovic<sup>2</sup>

Corresponding author:

Dr Sonja Marjanovic<sup>2</sup>

[smarjano@rand.org](mailto:smarjano@rand.org)

Tel: +44 1223 353 329

Fax: +44(0)1223 358 845

<sup>1</sup> RAND Europe Associate

<sup>2</sup> RAND Europe, Westbrook Centre, Cambridge, CB4 1YG, UK

<sup>3</sup> RAND Corporation, Pittsburgh, USA

<sup>4</sup> European Organisation for Research and Treatment of Cancer (EORTC), Brussels, Belgium

## **Supplementary File 1: Table of QOL Tools**

| Instrument                                                                            | Number of items | Subscales                                                                                                                                                                                                                                                                                                                         | Administration method | Patient population |
|---------------------------------------------------------------------------------------|-----------------|-----------------------------------------------------------------------------------------------------------------------------------------------------------------------------------------------------------------------------------------------------------------------------------------------------------------------------------|-----------------------|--------------------|
| <b>Multi-dimensional QoL questionnaires with patient population specific modules</b>  |                 |                                                                                                                                                                                                                                                                                                                                   |                       |                    |
| European Organization for Research and Treatment of Cancer (EORTC) – combined use of: |                 |                                                                                                                                                                                                                                                                                                                                   |                       |                    |
| EORTC QLQ-C30 <sup>1</sup><br>(core questionnaire)                                    | 30              | 5 functional subscales (physical, role, emotional, cognitive, and social functioning)<br>3 symptom scales (fatigue, nausea and vomiting, and pain)<br>1 global health status scale<br>1 overall quality of life scale,<br>6 single items (dyspnoea, insomnia, appetite loss, constipation, diarrhoea, and financial difficulties) | Self-administered     | Cancer             |
| EORTC QLQ-BN20 <sup>2</sup><br>(brain-tumour specific module)                         | 20              | 4 subscales (future uncertainty, visual disorders, motor dysfunction, and communication deficit)<br>7 single items (headache, seizures, drowsiness, hair loss, itchy skin, weakness of legs, and bladder control)                                                                                                                 | Self-administered     | Brain cancer       |
| Functional Assessment of Cancer Therapy-Brain (FACT-Br) – comprising:                 |                 |                                                                                                                                                                                                                                                                                                                                   |                       |                    |
| FACT-General (FACT-G) Version 4 <sup>3</sup><br>(core questionnaire)                  | 27              | 4 subscales (physical, social/family, emotional, and functional well-being)                                                                                                                                                                                                                                                       | Self-administered     | Cancer             |

<sup>1</sup> Aaronson NK, Ahmedzai S, Bergman B, et al. The European Organization for Research and Treatment of Cancer QLQ-C30: a quality-of-life instrument for use in international clinical trials in oncology. J Natl Cancer Inst. 1993;85:365–376.

<sup>2</sup> Osoba D, Aaronson NK, Muller M, et al. The development and psychometric validation of a brain cancer quality-of-life questionnaire for use in combination with general cancer-specific questionnaires. Qual Life Res. 1996;5:139–150.

<sup>3</sup> Cella DF, Tulsky DS, Gray G, et al. The Functional Assessment of Cancer Therapy scale: development and validation of the general measure. J Clin Oncol. 1993;11:570–579.

|                                                                        |    |                                                                                                                                                                                                                   |                                                                                             |              |
|------------------------------------------------------------------------|----|-------------------------------------------------------------------------------------------------------------------------------------------------------------------------------------------------------------------|---------------------------------------------------------------------------------------------|--------------|
| FACT-brain subscale <sup>4</sup><br>(brain-cancer specific module)     | 23 | 1 subscale (brain cancer related concerns including concentration, memory, seizures, eyesight, hearing, speech, personality, expression of thoughts, weakness, coordination, and headaches)                       | Self-administered                                                                           | Brain cancer |
| MD Anderson Symptom Inventory (MDASI) <sup>5</sup><br>combined use of: |    |                                                                                                                                                                                                                   |                                                                                             |              |
| MD Anderson Symptom Inventory (MDASI)<br>(core questionnaire)          | 19 | 2 subscales (severity of symptoms, interference of symptoms with activities of daily living)                                                                                                                      | Self-administered, interview or via telephone-based interactive voice response (IVR) system | Cancer       |
| MDASI-BT <sup>6</sup><br>(brain-tumour specific module)                | 9  | 1 subscale (brain cancer related symptoms - weakness, difficulty understanding, difficulty speaking, seizures, difficulty concentrating, vision, change in appearance, change in bowel pattern, and irritability) | Self-administered, interview or via telephone-based interactive voice response (IVR) system | Brain cancer |
| <b>Other multi-dimensional QoL questionnaires</b>                      |    |                                                                                                                                                                                                                   |                                                                                             |              |
| Rotterdam Symptom Check List (RSCL) <sup>7</sup>                       | 39 | 4 subscales (physical symptom distress, psychological distress, activity level, overall global life quality)                                                                                                      | Self-administered                                                                           | Cancer       |
| Functional Living Index- Cancer (FLIC) <sup>8</sup>                    | 22 | 5 domains (physical well-being and ability, emotional state, sociability, family situation, nausea)                                                                                                               | Self-administered                                                                           | Cancer       |
| Short-Form 36 questionnaire <sup>9</sup>                               | 36 | 8 subscales (vitality, physical functioning, bodily pain, general health perceptions, physical role functioning, emotional role functioning, social role functioning, mental                                      | Self-administered                                                                           | Generic      |

<sup>4</sup> Weitzner MA, Meyers CA, Gelke CK, et al. The Functional Assessment of Cancer Therapy (FACT) scale. Development of a brain subscale and revalidation of the general version (FACT-G) in patients with primary brain tumors. Cancer. 1995;75:1151–1161.

<sup>5</sup> Cleeland CS, Mendoza TR, Wang XS. Assessing symptom distress in cancer patients: the M.D. Anderson Symptom Inventory. Cancer. 2000;89:1634–1646.

<sup>6</sup> Armstrong TS, Mendoza T, Gning I, et al. Validation of the M.D. Anderson Symptom Inventory Brain Tumor Module (MDASI-BT) J Neurooncol. 2006;80:27–35.

<sup>7</sup> de Haes JC, van Knippenberg FC and Neijt JP: Measuring psychological and physical distress in cancer patients: structure and application of the Rotterdam Symptom Checklist. Br J Cancer 62: 1034-1038, 1990.

<sup>8</sup> Schipper H, Clinch J, McMurray A and Levitt M: Measuring the quality of life of cancer patients: the Functional Living Index- Cancer: development and validation. J Clin Oncol 2: 472-483, 1984.

<sup>9</sup> McHorney CA, Ware JE Jr and Raczek AE: The MOS 36-Item Short-Form Health Survey (SF-36): II. Psychometric and clinical tests of validity in measuring physical and mental health

|                                                                                                     |    |                                                                                                                                                                                                                                          |                        |              |
|-----------------------------------------------------------------------------------------------------|----|------------------------------------------------------------------------------------------------------------------------------------------------------------------------------------------------------------------------------------------|------------------------|--------------|
|                                                                                                     |    | health)                                                                                                                                                                                                                                  |                        |              |
| Nottingham Health Profile <sup>10</sup>                                                             | 45 | 6 subscales (energy level , pain, emotional reaction, sleep, social isolation, physical abilities) and 7 items on life areas affected (work, looking after the home, social life, home life, sex life, interests and hobbies, vacations) | Self-administered      | Generic      |
| <b>Single item or brief multi-item indices of QoL</b>                                               |    |                                                                                                                                                                                                                                          |                        |              |
| Linear Analog Scale Assessment (LASA) <sup>11 12</sup>                                              | 5  | 5 domains (1 item per domain - physical wellbeing, emotional well-being, spiritual well-being, intellectual well-being and overall QOL) - patients directly score their quality of life or functioning on a 100mm horizontal line        | Self-administered      | Brain-cancer |
| Spitzer Quality of Life Index (QLI) <sup>13</sup>                                                   | 5  | 5 domains (health, activity, daily living, outlook, support)                                                                                                                                                                             | Physician-administered | Cancer       |
| The schedule of evaluation of individual quality of life—direct weighting (SEIQoL-DW) <sup>14</sup> | 5  | Covers 5 areas of life selected by the patient to be important to QoL                                                                                                                                                                    | Interview-based        | Generic      |
| EuroQoL 5D                                                                                          | 6  | 5 subscales (mobility, self-care, usual activities, pain/discomfort and anxiety/depression) and self-rated health on a visual analogue scale                                                                                             | Self-administered      | Generic      |
| Sintonen's 15D                                                                                      |    |                                                                                                                                                                                                                                          |                        |              |
| <b>Instruments measuring a single factor of QoL*</b>                                                |    |                                                                                                                                                                                                                                          |                        |              |

constructs. Med Care 31: 247-263, 1993.

<sup>10</sup> Hunt SM, McKenna SP, McEwen J, Williams J and Papp E: The Nottingham Health Profile: subjective health status and medical consultations. Soc Sci Med 15: 221-229, 1981.

<sup>11</sup> Locke DE, Decker PA, Sloan JA, et al. Validation of single-item linear analog scale assessment of quality of life in neuro-oncology patients. J Pain Symptom Manage. 2007;34:628–638.

<sup>12</sup> Sloan JA, Aaronson N, Cappelleri JC, Fairclough DL, Varricchio C. Assessing the clinical significance of single items relative to summated scores. Mayo Clin Proc. 2002;77:479–487.

<sup>13</sup> Spitzer WO, Dobson AJ, Hall J, Chesterman E, Levi J, Shepherd R, Battista RN and Catchlove BR: Measuring the quality of life of cancer patients: a concise QL-index for use by physicians. J Chronic Dis 34: 585-597, 1981.

<sup>14</sup> Hickey AM, Bury G, O'Boyle CA, Bradley F, O'Kelly FD, Shannon W (1996) A new short form individual quality of life measure (SEIQoL-DW): Application in a cohort of individuals with HIV/AIDS. Br Med J (Clin Res Ed) 313:29–33

|                                                           |    |                                                                                                                                                         |                        |         |
|-----------------------------------------------------------|----|---------------------------------------------------------------------------------------------------------------------------------------------------------|------------------------|---------|
| The Karnofsky performance status scale <sup>15</sup>      | 1  | 100-point rating index to assess patients' physical and functional performance abilities (range from 0 (dead) to 100 (no impairment, normal activity)). | Physician-administered | Cancer  |
| Distress thermometer <sup>16</sup>                        | 1  | Single item visual analogue scale to screen for psychological distress                                                                                  | Self-administered      | Cancer  |
| Symptom Distress Scale (SDS) <sup>17</sup>                | 13 | Physical concerns in cancer patients                                                                                                                    | Self-administered      | Cancer  |
| Profile of Mood States-Short Form (POMS-SF) <sup>18</sup> | 30 | 6 subscales (tension/anxiety, vigor/activity, fatigue/inertia, depression/dejection, confusion/bewilderment, and anger/hostility)                       | Self-administered      | Cancer  |
| The hospital anxiety and depression scale <sup>19</sup>   | 14 | Two 7-item scales (anxiety, depression)                                                                                                                 | Self-administered      | Generic |
| Mini-Mental State Examination <sup>20</sup>               | 30 | Screening test for dementia and cognitive impairment                                                                                                    | Physician-administered | Generic |
| Multidimensional Fatigue Inventory                        |    |                                                                                                                                                         |                        |         |
| The McGill Pain Questionnaire                             |    |                                                                                                                                                         |                        |         |
| Activities of Daily Living                                |    |                                                                                                                                                         |                        |         |

\*These instruments are not strictly measuring QoL – so debatable as to whether we would include.

<sup>15</sup> Karnofsky DA, Abelman WH, Craver LF, Burchenal JH. The use of nitrogen mustards in the palliative treatment of carcinoma. *Cancer*. 1948;1:634–656.

<sup>16</sup> Keir, S. T., et al. (2008). "Screening for distress in patients with brain cancer using the NCCN's rapid screening measure." *Psychooncology* **17**(6): 621-625.

<sup>17</sup> McCorkle R, Benoliel J. Symptom distress, current concerns, and mood disturbance after diagnosis of life-threatening disease. *Soc Sci Med* 1983;17:431–438.

<sup>18</sup> Baker F, Denniston M, Zabora J, et al. A POMS short form for cancer patients: psychometric and structural evaluation. *Psychooncology* 2002;11:273–281.

<sup>19</sup> Zigmond AS and Snaith RP: The hospital anxiety and depression scale. *Acta Psychiatr Scand* 67: 361-370, 1983.

<sup>20</sup> Tombaugh TN, McIntyre NJ. The Mini-Mental State Examination: a comprehensive review. *J Am Geriatr Soc*. 1992;40:922–935.
