# Supplementary material for: The use and impact of quality of life assessment tools in clinical care settings for cancer patients, with a particular emphasis on brain cancer: insights from a systematic review and stakeholder consultations
Source: Springer Nature journal article supplement (doi:10.1007/s11136-016-1278-6), 2016-04-02
Supplement: MOESM2 [file 10682922]

## Supplementary File 2: Search Terms

**Title: The use and impact of quality of life assessment tools in clinical care settings for cancer patients, with a particular emphasis on brain cancer: insights from a systematic review and stakeholder consultations**

### AUTHORS

Dr Sarah King<sup>1</sup>  
Josephine Exley<sup>2</sup>  
Dr Sarah Parks<sup>2</sup>  
Dr Sarah Ball<sup>2</sup>  
Teresa Bienkowska-Gibbs<sup>2</sup>  
Calum MacLure<sup>2</sup>  
Emma Harte<sup>2</sup>  
Katherine Stewart<sup>2</sup>  
Jody Larkin<sup>3</sup>  
Dr Andrew Bottomley<sup>4</sup>  
Dr Sonja Marjanovic<sup>2</sup>

Corresponding author:

Dr Sonja Marjanovic<sup>2</sup>

[smarjano@rand.org](mailto:smarjano@rand.org)

Tel: +44 1223 353 329

Fax: +44(0)1223 358 845

<sup>1</sup> RAND Europe Associate

<sup>2</sup> RAND Europe, Westbrook Centre, Cambridge, CB4 1YG, UK

<sup>3</sup> RAND Corporation, Pittsburgh, USA

<sup>4</sup> European Organisation for Research and Treatment of Cancer (EORTC), Brussels, Belgium

## Search terms

### PubMed

((Cancer[title/abstract] OR neoplasms[MeSH] OR glioblastoma)  
AND  
("quality of life"[title/abstract] OR "health related quality of life"[title/abstract] OR  
QOL[title/abstract] OR HRQOL[title/abstract])  
AND  
(questionnaire\*[title/abstract] OR survey\*[title/abstract] OR measures[title/abstract]))

OR

((EORTC[title/abstract] AND QLQ-C30[title/abstract])

OR

(EORTC[title/abstract] AND BN-20 [title/abstract])  
 OR  
 (((("Symptom Inventory"[title/abstract] AND ("Brain Tumor"[title/abstract] OR "Brain Tumour"  
 [title/abstract])) AND "MD Anderson"[title/abstract])))  
 OR  
 "MDASI-BT"  
 OR  
 (((("functional assessment"[Title/Abstract]) AND "cancer therapy"[Title/Abstract])))  
 \*removed animal

## **Embase**

**(pub types: article and "article in press" only)**

(cancer\*:ab,ti OR neoplasm\*:ab,ti OR glioblastoma\*:ab,ti)  
 AND  
 ("quality of life":ab,ti OR "health related quality of life":ab,ti OR QOL:ab,ti OR HRQOL:ab,ti)  
 AND  
 (questionnaire\*:ab,ti OR survey\*:ab,ti OR measures:ab,ti)  
 OR  
 "EORTC QLQ-C30":ab,ti OR "European Organization for Research and Treatment of Cancer  
 Quality of Life Questionnaire-Core 30":ab,ti OR "EORTC BN-20":ab,ti OR "European Organization  
 for Research and Treatment of Cancer Quality of Life Questionnaire BN-20":ab,ti OR "Functional  
 Assessment of Cancer Therapy-Brain Subscale":ab,ti OR "FACT-Brs":ab,ti OR "Functional  
 Assessment of Cancer Therapy-General":ab,ti OR "FACT-G":ab,ti OR "MD Anderson Symptom  
 Inventory-Brain Tumour":ab,ti OR "MDASI-BT":ab,ti OR "MD Anderson Symptom Inventory-Brain  
 Tumor":ab,ti  
 NOT (Cats:ti OR canine:ab,ti OR dogs:ab,ti OR dog:ab,ti OR mice:ab,ti OR mouse:ab,ti)

## **Web of Science**

**(Science Citation Index Only)**

TS= (cancer\* OR neoplasm\* OR glioblastoma\*)  
 AND  
 TS= ("quality of life" OR "health related quality of life" OR QOL OR HRQOL)  
 AND  
 TS=(questionnaire\* OR survey\* OR measures)  
 OR  
 TS= ("EORTC QLQ-C30" OR "European Organization for Research and Treatment of Cancer  
 Quality of Life Questionnaire-Core 30" OR "EORTC BN-20" OR "European Organization for  
 Research and Treatment of Cancer Quality of Life Questionnaire BN-20" OR "Functional Assessment  
 of Cancer Therapy-Brain Subscale" OR "FACT-Brs" OR "Functional Assessment of Cancer Therapy-  
 General" OR "FACT-G" OR "MD Anderson Symptom Inventory-Brain Tumour" OR "MD  
 Anderson Symptom Inventory-Brain Tumor" OR "MDASI-BT" )  
 NOT

(TI=(mice OR mouse OR dog OR dogs OR canine OR cat OR cats OR rodent OR rodents OR rat OR rats))

### **Cochrane**

((cancer\* or neoplasm\* or glioblastoma\*):ab or (cancer\* or neoplasm\* or glioblastoma\*):ti (Word variations have been searched)

AND

("quality of life" or "health related quality of life" or QOL or HRQOL):ab or ("quality of life" or "health related quality of life" or QOL or HRQOL):ti (Word variations have been searched)

AND

(questionnaire\* or survey\* or measures):ab or (questionnaire\* or survey\* or measures):ti in Trials (Word variations have been searched))

OR

("EORTC QLQ-C30" or "European Organization for Research and Treatment of Cancer Quality of Life Questionnaire-Core 30":ab or "EORTC QLQ-C30" or "European Organization for Research and Treatment of Cancer Quality of Life Questionnaire-Core 30":ti

OR

"Functional Assessment of Cancer Therapy-Brain Subscale" or "FACT-Brs" or "Functional Assessment of Cancer Therapy-General" or "FACT-G" or "MD Anderson Symptom Inventory-Brain Tumour" or "MD Anderson Symptom Inventory-Brain Tumor" or "MDASI-BT":ti or "Functional Assessment of Cancer Therapy-Brain Subscale" or "FACT-Brs" or "Functional Assessment of Cancer Therapy-General" or "FACT-G" or "MD Anderson Symptom Inventory-Brain Tumour" or "MD Anderson Symptom Inventory-Brain Tumor" or "MDASI-BT":ab

OR

"EORTC QLQ-C30" or "European Organization for Research and Treatment of Cancer Quality of Life Questionnaire-Core 30":ab or "EORTC QLQ-C30" or "European Organization for Research and Treatment of Cancer Quality of Life Questionnaire-Core 30":ti

OR

EORTC BN-20" or "European Organization for Research and Treatment of Cancer Quality of Life Questionnaire BN-20":ti or "EORTC BN-20" or "European Organization for Research and Treatment of Cancer Quality of Life Questionnaire BN-20":ab
